# Supplementary material for: Structural and functional divergence of two fish aquaporin-1 water channels following teleost-specific gene duplication
Source: PubMed Central journal article supplement (PMC2564943; doi:10.1186/1471-2148-8-259), 2008-09-23
Supplement: 1471-2148-8-259-S4.pdf [file 1471-2148-8-259-S4.pdf]

## Additional file 4

### Forward and reverse primers employed to introduce mutations into the sea bream Aqp1b cDNA

---

|             | Forward primer 5'-3'/Reverse primer 5'-3'                                                                       |
|-------------|-----------------------------------------------------------------------------------------------------------------|
| T229A       | CACGAGCGCAAACTTCAGGG <u>GCG</u> CGCAGGAATGTTCTGC/<br>GCAGAACATTCTGCG <u>GCC</u> CTGAAGTTTTGCGCTCGTG             |
| T229D       | GCGCAAACTTCAGGG <u>ACC</u> CGCAGGAATGTTCTG/<br>CAGAACATTCTGCG <u>GTC</u> CTGAAGTTTTGCGC                         |
| L234A/L235A | ACGCGCCGGAATGTT <u>GCGG</u> CTAATGGTTCAGAA/<br>TTCTGAACCATT <u>AGCCG</u> CAACATTCCGGCGCGT                       |
| S238A       | GGAATGTTCTGCTTAATGGT <u>GCA</u> GAAAGATGAAGACGCTGG/<br>CCAGCGTCTTCATCTT <u>TGC</u> ACCATTAAGCAGAACATTCC         |
| S253A       | GACGCACCTAGAGAAGGCAAC <u>GCC</u> AGCCCGGGGCCAAGTCAGGG/<br>CCCTGACTTGGCCCCGGGCT <u>GGC</u> GTTGCCTTCTCTAGGTGCGTC |
| S254A       | CTAGAGAAGGCAACAGC <u>GCCC</u> CGGGGCCAAGTCAG/<br>CTGACTTGGCCCCGG <u>GCG</u> GCTGTTGCCTTCTCTAG                   |
| S254D       | CTAGAGAAGGCAACAGC <u>GACCC</u> CGGGGCCAAGTCAG/<br>CTGACTTGGCCCCGG <u>TTC</u> GCTGTTGCCTTCTCTAG                  |
| S258A       | GCAACAGCAGCCCGGGGCC <u>AGCT</u> CAGGGGCCAAGTCAGTGGC/<br>GCCACTGACTTGGCCCCT <u>GAGCT</u> GGCCCCGGGCTGCTGTTGC     |
| S262A       | CCGGGGCCAAGTCAGGGGCC <u>AGCT</u> CAGTGGCCAAAGCACTG/<br>CAGTGCTTTGGCCACT <u>GAGCT</u> GGCCCCTGACTTGGCCCCGG       |

---

Mutated codons are underlined.
